# Supplementary material for: TissUExM enables quantitative ultrastructural analysis in whole vertebrate embryos by expansion microscopy
Source: PubMed Central journal article supplement (PMC9606133; doi:10.1016/j.crmeth.2022.100311), 2022-09-30
Supplement: mmc1.pdf [file mmc1.pdf]

**Cell Reports Methods, Volume 2**

**Supplemental information**

**TissUExM enables quantitative ultrastructural  
analysis in whole vertebrate embryos  
by expansion microscopy**

**Emmanuelle Steib, Rob Tetley, Romain F. Laine, Dominic P. Norris, Yanlan Mao, and Julien Vermot**

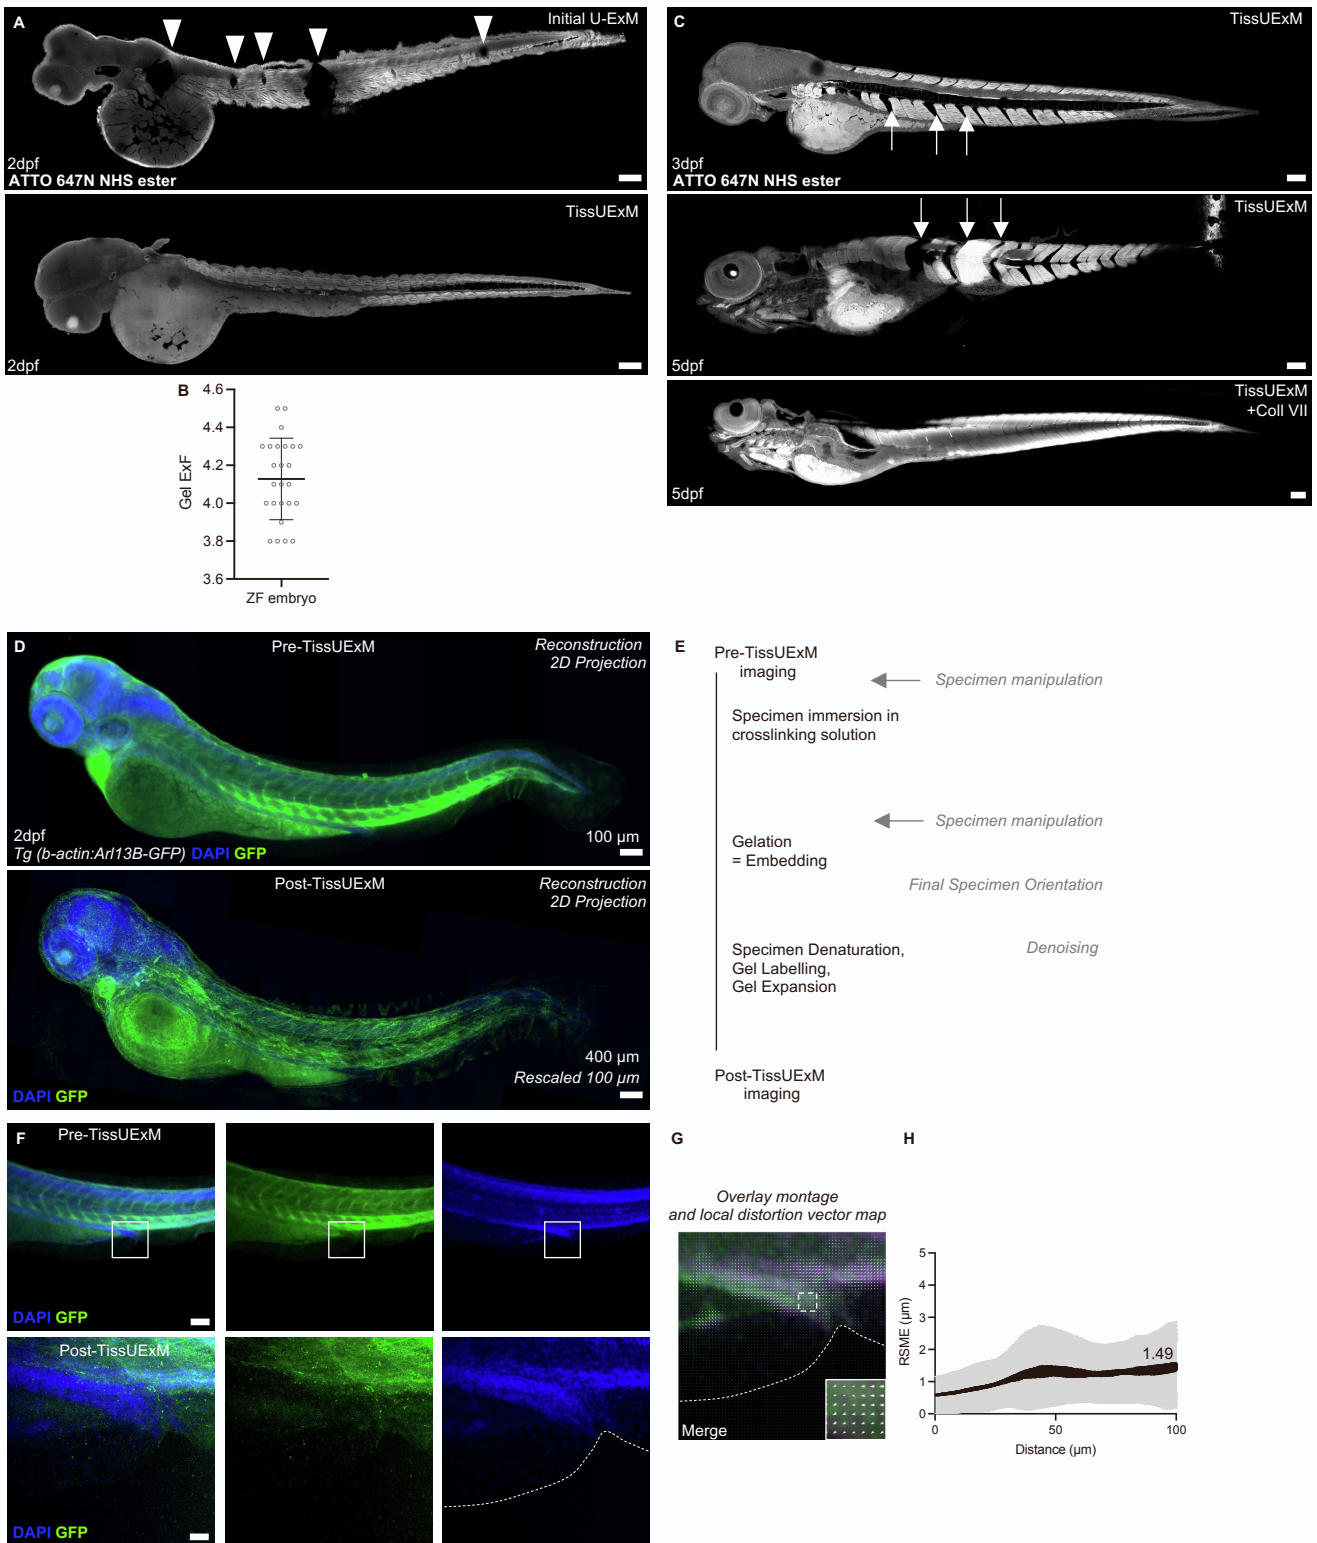

Supplemental Figure 1

*Figure S1: TissUExM allows expansion of whole ZF embryos, Related to Figure 1*

- (A) 48hpf ZF processed with the initial U-ExM approach (top panel) or TissUExM (bottom panel), stained with ATTO 647N NHS-ester. White arrows point to cracking and specimen damage. Note that cracks are randomly localized. 10X/0.40 objective, scale bar: 100 $\mu$ m.
- (B) Reproducibility of gel expansion factors for TissUExM processed 48hpf ZF embryo. Mean +/- SD: 4.1 +/- 0.2, n=25 from 11 independent experiments.
- (C) 3 to 5dpf ZF processed with basic TissUExM (top panels) or TissUExM+Collagenase VII digestion (bottom panel), stained with ATTO 647N NHS-ester. White arrows point to cracking and specimen damage. Note that cracks are restricted to myotendinous regions. 10X/0.40 objective, scale bar: 100 $\mu$ m, n=12 with 2 specimen/developmental stage/experiment, from 2 independent experiments.
- (D) 48hpf Tg (b-actin:Arl13B-GFP) ZF imaged pre- (top panel) and post- (bottom panel) TissUExM, stained with DAPI. Entire specimen reconstruction and 2D-projection obtained from confocal imaging performed on individual tiles. 10X/0.40 objective. Pre-TissUExM corresponds to direct embryo imaging while post-TissUExM is obtained from gel-imaging. Note the appearance of the yolk-sac pre-TissUExM, with heterogenous protein density resulting from PFA-fixation.
- (E) Pipeline recapitulating embryo manipulation during TissUExM.
- (F) Example of the excretory canal as landmark pair for pre-(top) and post (bottom)-TissUExM distortion analysis. Inset in pre-TissUExM image corresponds to the expanded region displayed in the post-TissUExM image. 10X/0.40 objective, scale bars are respectively 100 $\mu$ m and 25 $\mu$ m.
- (G) Overlay montage based on DAPI labelling, with post-TissUExM image automatically identified within pre-TissUExM image. Inset shows individual vectors for distortion analysis.
- (H) Distortion analysis with individual Root Square Method Error (RSME,  $\mu$ m) for rescaled distance ( $\mu$ m). Mean +/- SD value 100 $\mu$ m away from centre: 1.49 +/- 0.9 $\mu$ m, n=20 pairs from two independent experiments. Note that RSME value at centre differs from 0 due to tilt in 3D specimen orientation between pre- and post-imaging.

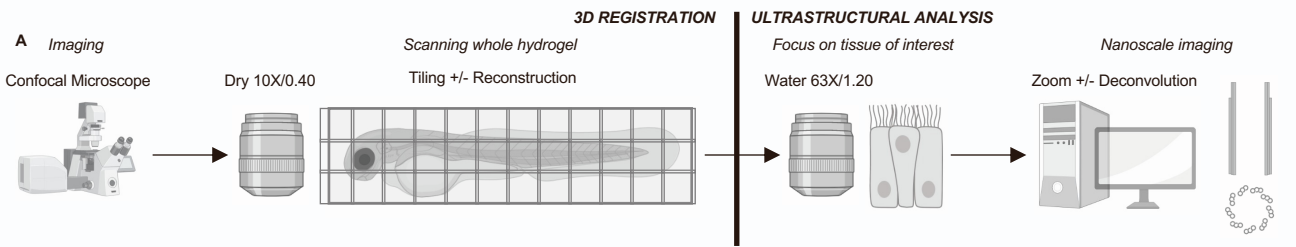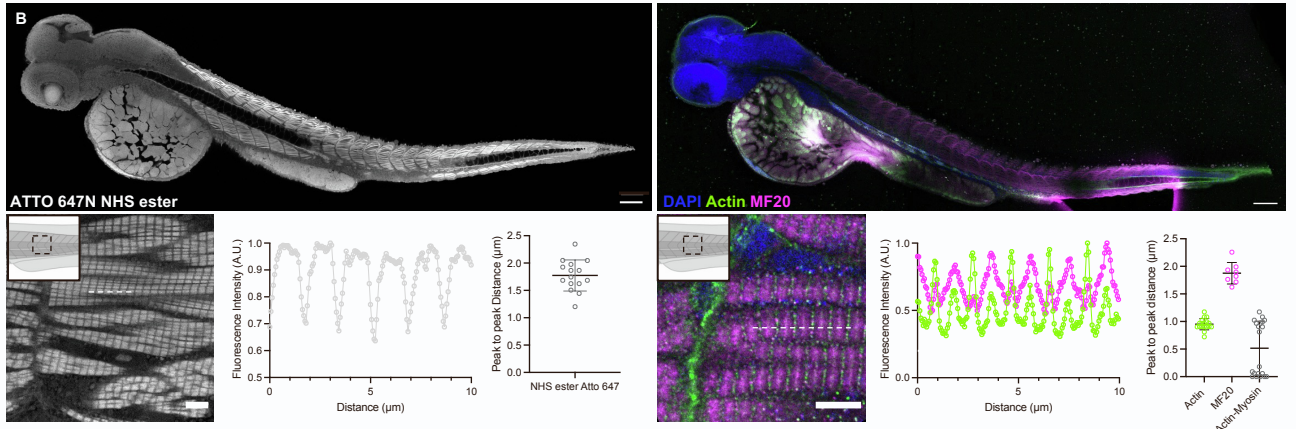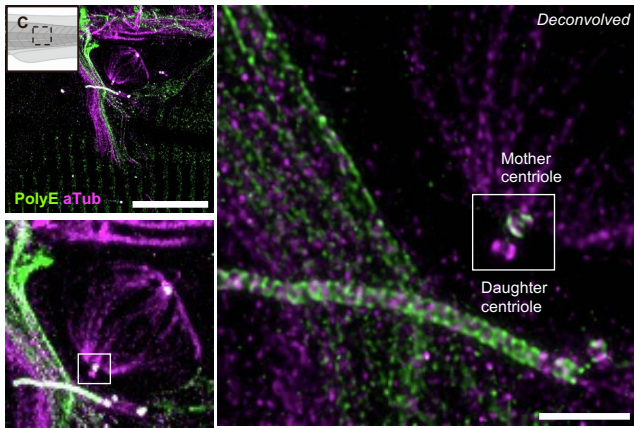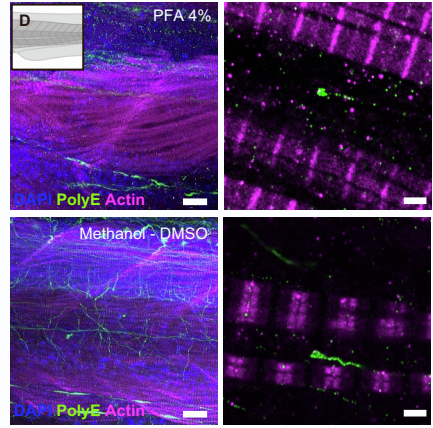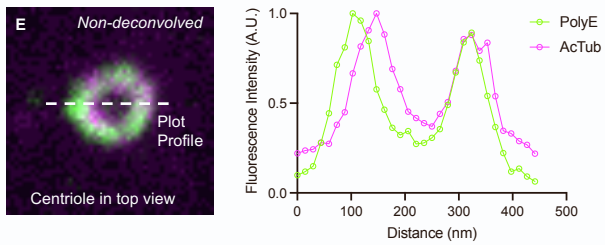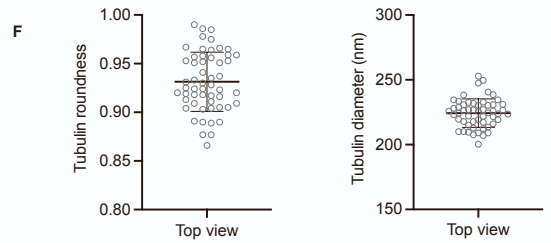

Supplemental Figure 2

*Figure S2: TissUExM allows immunolabelling of whole ZF embryos and imaging at the nanoscale, Related to Figure 2*

- (A) Schematic representation of confocal imaging pipeline with respective objectives for different magnifications and degrees of details. Note that 63X working distance is limiting so multiple gel orientations should be considered. One gel can be imaged from different sides to maximize access to tissues of interest.
- (B) TissUExM processed 48hpf ZF, labelled with ATTO 647N NHS ester (left panel) and immuno-stained for actin (green) and sarcomere myosin heavy chain (MF20, magenta) (right panel). 10X/0.40 objective, scale bar: 100 $\mu$ m. Inset on the sarcomeres and measurement of fluorescence intensity. Scale bar: 5 $\mu$ m. Mean  $\pm$  SD peak-to-peak distance with NHS labelling: 1.8  $\pm$  0.3  $\mu$ m, n=15 distances from measures in three different sarcomeres. Mean  $\pm$  SD peak-to-peak distance with acto-myosin labelling: respectively between actin 0.9  $\pm$  0.1  $\mu$ m, MF20 1.8  $\pm$  0.2  $\mu$ m and between acto-myosin.
- (C) Trunk from TissUExM processed 48hpf ZF, stained for PolyE (green) and alpha-tubulin (magenta). Focus on mitotic cell near the spinal cord. Inset on deconvoluted image shows individual centrioles within the centrosome, with PolyE-positive mother centriole and PolyE-negative daughter centriole. 63X/1.20 objective, scale bars: 10 $\mu$ m, 1 $\mu$ m.
- (D) Trunk from TissUExM-processed ZF embryos (10X), fixed at 48hpf either with PFA 4% (top panel) or Methanol 80%-DMSO 20% (bottom panel). Both specimen-embedded gels are processed in parallel and stained with PolyE (green) or Actin (magenta). Insets on sarcomeres and primary cilia (63X), showing that epitope conservation for individual antibodies is differentially affected by pre-TissUExM fixation, independently of gel processing. Scale bars: 20 $\mu$ m, 1 $\mu$ m.
- (E) Representative TissUExM centriole in top view, with lumen resolved without deconvolution and associated plot profile.
- (F) Validation of nanoscale isotropy. Mean  $\pm$  SD centriole roundness: 0.9313  $\pm$  0.03. n=54 centrioles from five independent experiments. Mean  $\pm$  SD centriole diameter: 224  $\pm$  11 nm, n=54 centrioles from five independent experiments.

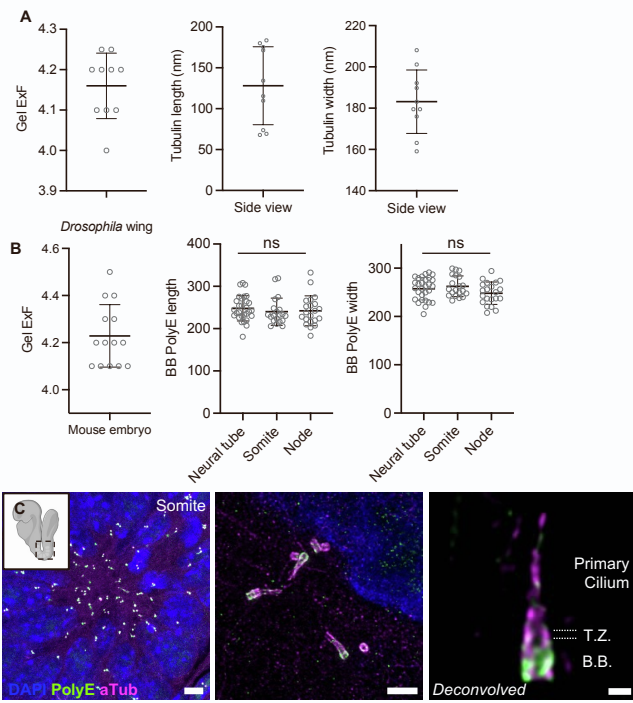

Supplemental Figure 3

*Figure S3: TissUExM permits nanoscale expansion for different developmental models, Related to Figure 3*

(A) Expansion validation in *Drosophila* wing discs. Reproducible expansion with Gel ExF mean  $\pm$  SD: 4.16 $\pm$ 0.1. n=10 gels from three independent experiments. Mean  $\pm$  SD centriolar tubulin length in side-view: 128 $\pm$ 48nm, n=10 centrioles from three independent experiments. Mean  $\pm$  SD centriolar tubulin width in side-view: 183  $\pm$  15nm, n=10 centrioles from three independent experiments.

(B) Expansion validation in mouse embryos. Reproducible expansion with Gel ExF mean  $\pm$  SD: 4.22  $\pm$  0.1. n=14 gels from six independent experiments. Mean  $\pm$  SD Basal body PolyE length respectively in neural tube 248  $\pm$  30nm, somite 240  $\pm$  32nm and node 242  $\pm$  35nm, n $\geq$ 20 centriole/tissue from three independent experiments One-way ANOVA and Kruskal- Wallis ns p= 0.3532. Mean  $\pm$  SD Basal body PolyE width respectively in neural tube 257  $\pm$  23nm, somite 262  $\pm$  21nm and node 248  $\pm$  23nm, n $\geq$ 20 centriole/tissue from three independent experiments One-way ANOVA ns p= 0.1235.

(C) Confocal imaging of a E8.5 mouse somite co-stained for PolyE (green) and a-tub (magenta). DAPI is in blue. From left to right: centre of the somite enriched in basal bodies (10X), multiple basal body/cilia complexes and inset on a primary cilium (63X). Scale bars respectively: 5 $\mu$ m, 1 $\mu$ m and 200nm.

## Supplemental Tables

| Protocol Name                     | Models                                                                              | Whole organism | Isotropy mm- $\mu$ m-nm | Commercial antibodies | High density labelling of endogenous proteins | Ultra-structure | Standard protocol across applications |
|-----------------------------------|-------------------------------------------------------------------------------------|----------------|-------------------------|-----------------------|-----------------------------------------------|-----------------|---------------------------------------|
| Accepted publications             |                                                                                     |                |                         |                       |                                               |                 |                                       |
| ExM, Chen 2015                    | 100 $\mu$ m mice brain sections, cultured cells                                     | -              | YES                     | -                     | -                                             | YES             | -                                     |
| MAP, Ku 2016                      | Dissected organs from 8-weeks mice, cultured cells                                  | -              | Limited to mm- $\mu$ m  | YES                   | YES                                           | -               | -                                     |
| ProExM, Tillberg 2016             | 100 $\mu$ m mice brain sections, 10 $\mu$ m human tissues sections, cultured cells, | -              | YES                     | YES                   | -                                             | YES             | -                                     |
| ExM zebrafish, Freifeld 2017      | Dissected zebrafish heads                                                           | -              | Limited to mm- $\mu$ m  | Limited               | -                                             | -               | -                                     |
| U-ExM, Gambarotto 2019            | Isolated organelles, protists, cultured cells                                       | -              | Limited to $\mu$ m-nm   | YES                   | YES                                           | YES             | -                                     |
| TRex, Damstra 2021                | 100 $\mu$ m mice brain sections, cultured cells                                     | -              | Limited to $\mu$ m-nm   | YES                   | YES                                           | YES             | -                                     |
| Cryo-ExM, Laporte 2022            | Cultured cells                                                                      | -              | Limited to $\mu$ m-nm   | YES                   | YES                                           | YES             | YES                                   |
| Modified U-ExM, Mercey 2022       | Mice retinal sections                                                               | -              | Limited to $\mu$ m-nm   | YES                   | YES                                           | YES             | -                                     |
| Preprints                         |                                                                                     |                |                         |                       |                                               |                 |                                       |
| Whole ExM, Sim 2021, updated 2022 | 100 $\mu$ m mice brain sections, whole zebrafish embryos, whole mouse embryo        | YES            | Limited to mm- $\mu$ m  | Limited               | -                                             | -               | -                                     |
| TissUExM, This study              | Whole zebrafish embryos, <i>Drosophila</i> wings, whole mouse embryo                | YES            | YES                     | YES                   | YES                                           | YES             | YES                                   |

Table S1: Summary description of major ExM protocols relevant for this study and rational for the development of TissUExM, Related to Figure 1



|          | <b>Crosslinking</b>        | <b>Embedding</b>                   | <b>Denaturation</b>             | <b>Damage</b>                                       | <b>Damage observation</b>                                                                       |
|----------|----------------------------|------------------------------------|---------------------------------|-----------------------------------------------------|-------------------------------------------------------------------------------------------------|
| U-ExM    | 1.4%FA, 2%AA - 5hrs        | 0.5% TEMED, 0.5% APS<br>5min + 1hr | 90min - 95C                     | Major,<br>irrespective of<br>regions                | Uncleared<br>specimen,<br>between<br>gelation and<br>denaturation,<br>amplified by<br>expansion |
| V2       | ↑AA concentration<br>(20%) | ↓ TEMED and APS<br>↑ Time          | ↓ Temperature<br>↑ Time (20hrs) | Important,<br>mainly in the<br>trunk                | Uncleared<br>specimen,<br>between<br>gelation and<br>denaturation                               |
| V3       | -                          | ↑ 4-OH-TEMPO                       | -                               | Important,<br>mainly in the<br>trunk                | Uncleared<br>specimen,<br>between<br>gelation and<br>denaturation                               |
| V4       | ↑Triton (0.1%)             | ↑Triton (0.1%)                     | -                               | Variable,<br>restricted to<br>deep trunk<br>tissues | Cleared<br>specimen,<br>after<br>expansion and<br>NHS-labelling                                 |
| V5       | -                          | -                                  | ↑ Time (72hrs)                  | Variable,<br>mostly in the<br>centre of the<br>tail | Cleared<br>specimen,<br>after<br>expansion and<br>NHS-labelling                                 |
| V6       | ↑ Time (24hrs)             | -                                  | -                               | Minimal,<br>restricted to<br>the tail               | Cleared<br>specimen,<br>after<br>expansion and<br>NHS-labelling                                 |
| TissUExM | ↑ Time (72hrs)             | -                                  | -                               | No damage                                           | N/A                                                                                             |

*Table S2: Technical iterations to develop TissUExM, Related to STAR methods*
